# Supplementary material
Source: PubMed Central journal article supplement (PMC5915192)
Supplement: EHP604.s001.acco.pdf [file EHP604.s001.acco.pdf]

**Note to readers with disabilities:** *EHP* strives to ensure that all journal content is accessible to all readers. However, some figures and Supplemental Material published in *EHP* articles may not conform to [508 standards](#) due to the complexity of the information being presented. If you need assistance accessing journal content, please contact [ehp508@niehs.nih.gov](mailto:ehp508@niehs.nih.gov). Our staff will work with you to assess and meet your accessibility needs within 3 working days.

### **Supplemental Material**

#### **Combined Prenatal Pesticide Exposure and Folic Acid Intake in Relation to Autism Spectrum Disorder**

Rebecca J. Schmidt, Ph.D., Vladimir Kogan, Janie F. Shelton, Ph.D., Lora Delwiche, Ph.D., Robin L. Hansen, M.D., Sally Ozonoff, Ph.D., Claudia C. Ma, M.S., M.P.H., Erin C. McCanlies, Ph.D., Deborah H. Bennett, Ph.D., Irva Hertz-Picciotto, Ph.D., M.P.H., Daniel Tancredi, Ph.D., Heather E. Volk, Ph.D., M.P.H.

#### **Table of Contents**

**TABLE S1.** Combinations of Household Pesticide Exposure and Maternal Folic Acid Intake the First Month of Pregnancy in Relation to Risk for Autism Spectrum Disorders (ASD) in Fully-Adjusted Models

**TABLE S2.** Combinations of Agricultural Pesticide Exposure and Maternal Folic Acid Intake the First Month of Pregnancy in Relation to Risk for Autism Spectrum Disorders (ASD) in Fully-Adjusted Models

**TABLE S3.** Combinations of Household Pesticide Exposure Including Flea and Tick Pet Collars and Maternal Folic Acid Intake the First Month of Pregnancy in Relation to Risk for Autism Spectrum Disorders (ASD)

**TABLE S4.** Combinations of Household Pesticide Exposure and Maternal Folic Acid Intake the First Month of Pregnancy in Relation to Risk for Autism Spectrum Disorders (ASD) with Folic Acid (FA) Dichotomized at 600  $\mu\text{g}$

**TABLE S5.** Combinations of Agricultural Pesticide Exposure and Maternal Folic Acid Intake the First Month of Pregnancy in Relation to Risk for Autism Spectrum Disorders (ASD) with Folic Acid (FA) Dichotomized at 600  $\mu\text{g}$

**TABLE S6.** Combinations of Agricultural Pesticide Exposure During Pregnancy and Maternal Folic Acid Intake the First Month of Pregnancy in Relation to Risk for Autism Spectrum Disorders (ASD)

**TABLE S7.** Combinations of Agricultural Pesticide Exposure and Maternal Folic Acid Intake the First Month of Pregnancy in Relation to Risk for Autism Spectrum Disorders (ASD) using a 1500 m Buffer

**TABLE S8.** Combinations of Agricultural Pesticide Exposure and Maternal Folic Acid Intake the First Month of Pregnancy in Relation to Risk for Autism Spectrum Disorders (ASD) using a 1750 m Buffer

**TABLE S9.** AIC <sup>a</sup> for Assessing Goodness of Fit for Models with and without Multiplicative Interaction Terms

**TABLE S10.** Combinations of Household Pesticide Exposure and Maternal Vitamin B12 Intake the First Month of Pregnancy in Relation to Risk for Autism Spectrum Disorders (ASD)

**TABLE S11.** Combinations of Agricultural Pesticide Exposure and Maternal Vitamin B12 Intake the First Month of Pregnancy in Relation to Risk for Autism Spectrum Disorders (ASD) using a 1250 m Buffer

**TABLE S12.** Combinations of Household Pesticide Exposure and Maternal Vitamin B6 Intake the First Month of Pregnancy in Relation to Risk for Autism Spectrum Disorders (ASD)

**TABLE S13.** Combinations of Agricultural Pesticide Exposure and Maternal Vitamin B6 Intake the First Month of Pregnancy in Relation to Risk for Autism Spectrum Disorders (ASD) using a 1250 m Buffer

**TABLE S14.** Combinations of Household Pesticide Exposure and Maternal Folic Acid and Vitamin B6 Intake the First Month of Pregnancy in Relation to Risk for Autism Spectrum Disorders (ASD)

**TABLE S15.** Combinations of Agricultural Pesticide Exposure and Maternal Folic Acid and Vitamin B6 Intake the First Month of Pregnancy in Relation to Risk for Autism Spectrum Disorders (ASD) using a 1250 m Buffer

**TABLE S16.** Combinations of Household, Agricultural, and Occupational Pesticide Exposure and Maternal Folic Acid Intake the First Month of Pregnancy in Relation to Risk for Autism Spectrum Disorders (ASD)

**TABLE S1.** Combinations of Household Pesticide Exposure and Maternal Folic Acid Intake the First Month of Pregnancy in Relation to Risk for Autism Spectrum Disorders (ASD) in Fully-Adjusted Models

| Pesticide Exposure During Pregnancy |                      | Maternal Folic Acid Intake <sup>a</sup> | ASD No. (%) | Typically Developing No. (%) | Expected Joint OR: Multiplicative Model | Expected Joint OR: Additive Model | OR <sup>b</sup> (95% CI) |
|-------------------------------------|----------------------|-----------------------------------------|-------------|------------------------------|-----------------------------------------|-----------------------------------|--------------------------|
| Indoor Sprays or Foggers            | None                 | 800 + µg                                | 95 (31.4)   | 110 (47.4)                   |                                         |                                   | 1.0                      |
|                                     |                      | < 800 µg                                | 111 (36.6)  | 77 (33.2)                    |                                         |                                   | 2.0 (1.0, 3.8)           |
|                                     | Any                  | 800 + µg                                | 48 (15.8)   | 25 (10.8)                    |                                         |                                   | 2.4 (1.3, 4.2)           |
|                                     |                      | < 800 µg                                | 49 (16.2)   | 20 (8.6)                     | 4.8                                     | 3.4                               | 3.7 (1.7, 8.2)           |
| Pet Flea and Tick Products          | None                 | 800 + µg                                | 116 (35.8)  | 113 (47.1)                   |                                         |                                   | 1.0                      |
|                                     |                      | < 800 µg                                | 136 (42)    | 87 (36.3)                    |                                         |                                   | 1.5 (0.8, 2.8)           |
|                                     | Some <sup>c</sup>    | 800 + µg                                | 7 (2.2)     | 12 (5.0)                     |                                         |                                   | 0.8 (0.3, 2.2)           |
|                                     |                      | < 800 µg                                | 8 (2.5)     | 7 (2.9)                      | 1.2                                     | 1.3                               | 1.3 (0.4, 4.3)           |
|                                     | Regular <sup>d</sup> | 800 + µg                                | 32 (9.9)    | 16 (6.7)                     |                                         |                                   | 1.8 (0.9, 3.6)           |
|                                     |                      | < 800 µg                                | 25 (7.7)    | 5 (2.1)                      | 2.7                                     | 2.3                               | 4.5 (1.5, 14.2)          |
|                                     | Any <sup>e</sup>     | 800 + µg                                | 39 (12.0)   | 28 (11.7)                    |                                         |                                   | 1.4 (0.8, 2.6)           |
|                                     |                      | < 800 µg                                | 33 (10.2)   | 12 (5.0)                     | 2.1                                     | 1.9                               | 2.7 (1.1, 6.6)           |
| Any Indoor <sup>f</sup> Pesticides  | None                 | 800 + µg                                | 71 (23.2)   | 85 (37.1)                    |                                         |                                   | 1.0                      |
|                                     |                      | < 800 µg                                | 92 (30.1)   | 70 (30.6)                    |                                         |                                   | 1.8 (0.9, 3.6)           |
|                                     | Any                  | 800 + µg                                | 74 (24.2)   | 47 (20.5)                    |                                         |                                   | 1.9 (1.2, 3.2)           |
|                                     |                      | < 800 µg                                | 69 (22.6)   | 27 (11.8)                    | 3.4                                     | 2.7                               | 3.7 (1.7, 8.0)           |
| Outdoor Sprays or Foggers           | None                 | 800 + µg                                | 89 (30.9)   | 91 (41.2)                    |                                         |                                   | 1.0                      |
|                                     |                      | < 800 µg                                | 92 (31.9)   | 65 (29.4)                    |                                         |                                   | 1.2 (0.6, 2.3)           |
|                                     | Some <sup>c</sup>    | 800 + µg                                | 30 (10.4)   | 27 (12.2)                    |                                         |                                   | 1.5 (0.8, 2.9)           |
|                                     |                      | < 800 µg                                | 17 (5.9)    | 18 (8.1)                     | 1.8                                     | 1.7                               | 1.0 (0.4, 2.6)           |
|                                     | Regular <sup>d</sup> | 800 + µg                                | 21 (7.3)    | 12 (5.4)                     |                                         |                                   | 1.9 (0.8, 4.2)           |
|                                     |                      | < 800 µg                                | 39 (13.5)   | 8 (3.6)                      | 2.3                                     | 2.1                               | 4.5 (1.7, 11.8)          |
|                                     | Any <sup>e</sup>     | 800 + µg                                | 51 (17.7)   | 39 (17.7)                    |                                         |                                   | 1.6 (0.9, 2.8)           |
|                                     |                      | < 800 µg                                | 56 (19.4)   | 26 (11.8)                    | 1.9                                     | 1.8                               | 2.2 (1.1, 4.7)           |

|                                                     |      |                     |           |           |     |     |                |
|-----------------------------------------------------|------|---------------------|-----------|-----------|-----|-----|----------------|
| Any Household<br>Indoor or<br>Outdoor<br>Pesticides | None | 800 + $\mu\text{g}$ | 57 (19.9) | 63 (28.8) |     |     | 1.0            |
|                                                     |      | < 800 $\mu\text{g}$ | 70 (24.4) | 54 (24.7) |     |     | 1.5 (0.7, 3.4) |
|                                                     | Any  | 800 + $\mu\text{g}$ | 79 (27.5) | 63 (28.8) |     |     | 1.7 (1.0, 2.9) |
|                                                     |      | < 800 $\mu\text{g}$ | 81 (28.2) | 39 (17.8) | 2.6 | 2.2 | 2.9 (1.4, 6.2) |
| Any Household<br>or Agricultural<br>Pesticides      | None | 800 + $\mu\text{g}$ | 43 (16.1) | 50 (25.0) |     |     | 1.0            |
|                                                     |      | < 800 $\mu\text{g}$ | 56 (21)   | 42 (21.0) |     |     | 1.8 (0.7, 4.2) |
|                                                     | Any  | 800 + $\mu\text{g}$ | 87 (32.6) | 66 (33.0) |     |     | 1.8 (1.0, 3.1) |
|                                                     |      | < 800 $\mu\text{g}$ | 81 (30.3) | 42 (21.0) | 3.2 | 2.6 | 3.5 (1.5, 7.9) |

Abbreviations: CI, confidence interval; OR, odds ratio.

<sup>a</sup> Average daily intake during first month of pregnancy.

<sup>b</sup> ORs adjusted for home ownership, child's birth year, study region, race/ethnicity, insurance type, and maternal age, birthplace, education, smoking, intake of vitamins A (natural log), C (natural log), D (natural log), B6, and B12 and calcium in pregnancy month 1, and consumption of an iron supplement in month 6.

<sup>c</sup> Exposure to pesticides reported for <6 months of pregnancy.

<sup>d</sup> Exposure to pesticides reported for 6+ months of pregnancy.

<sup>e</sup> Percentages are relative to categorization into four level variable.

<sup>f</sup> Maternally-reported exposure to professionally- or self-applied pesticide sprays or foggers, or pet pesticides (flea/tick shampoos, pouches, not collars), inside the home during pregnancy.

**TABLE S2.** Combinations of Agricultural Pesticide Exposure and Maternal Folic Acid Intake the First Month of Pregnancy in Relation to Risk for Autism Spectrum Disorders (ASD) in Fully-Adjusted Models

| Periconceptional Agricultural/Commercial Pesticide Exposure <sup>a</sup> |      | Maternal Folic Acid Intake <sup>b</sup> | ASD No. (%) | Typically Developing No. (%) | Expected Joint OR: Multiplicative Model | Expected Joint OR: Additive Model | Observed OR <sup>c</sup> (95% CI) |
|--------------------------------------------------------------------------|------|-----------------------------------------|-------------|------------------------------|-----------------------------------------|-----------------------------------|-----------------------------------|
| Chlorpyrifos                                                             | None | 800 + µg                                | 148 (45.3)  | 126 (54.1)                   | 2.2                                     | 2.0                               | 1.0                               |
|                                                                          |      | < 800 µg                                | 154 (47.1)  | 92 (39.5)                    |                                         |                                   | 1.7 (0.9, 3.1)                    |
|                                                                          | Any  | 800 + µg                                | 12 (3.7)    | 10 (4.3)                     |                                         |                                   | 1.3 (0.5, 3.2)                    |
|                                                                          |      | < 800 µg                                | 13 (4)      | 5 (2.2)                      |                                         |                                   | 4.6 (1.3, 15.9)                   |
| Organophosphates                                                         | None | 800 + µg                                | 134 (41)    | 114 (48.9)                   | 1.4                                     | 1.4                               | 1.0                               |
|                                                                          |      | < 800 µg                                | 139 (42.5)  | 87 (37.3)                    |                                         |                                   | 1.5 (0.8, 2.9)                    |
|                                                                          | Any  | 800 + µg                                | 26 (8.0)    | 22 (9.4)                     |                                         |                                   | 0.9 (0.5, 1.8)                    |
|                                                                          |      | < 800 µg                                | 28 (8.6)    | 10 (4.3)                     |                                         |                                   | 3.8 (1.5, 10.0)                   |
| Pyrethroids                                                              | None | 800 + µg                                | 139 (42.5)  | 119 (51.1)                   | 1.8                                     | 1.7                               | 1.0                               |
|                                                                          |      | < 800 µg                                | 142 (43.4)  | 87 (37.3)                    |                                         |                                   | 1.6 (0.9, 3)                      |
|                                                                          | Any  | 800 + µg                                | 21 (6.4)    | 17 (7.3)                     |                                         |                                   | 1.1 (0.5, 2.3)                    |
|                                                                          |      | < 800 µg                                | 25 (7.7)    | 10 (4.3)                     |                                         |                                   | 3.3 (1.3, 8.4)                    |
| Carbamates                                                               | None | 800 + µg                                | 149 (45.6)  | 132 (56.7)                   | 3.8                                     | 2.9                               | 1.0                               |
|                                                                          |      | < 800 µg                                | 158 (48.3)  | 92 (39.5)                    |                                         |                                   | 1.8 (1.0, 3.3)                    |
|                                                                          | Any  | 800 + µg                                | 11 (3.4)    | 4 (1.7)                      |                                         |                                   | 2.1 (0.6, 7)                      |
|                                                                          |      | < 800 µg                                | 9 (2.8)     | 5 (2.2)                      |                                         |                                   | 2.3 (0.7, 8.2)                    |
| Any Agricultural Pesticides                                              | None | 800 + µg                                | 127 (38.8)  | 112 (48.1)                   | 1.8                                     | 1.7                               | 1.0                               |
|                                                                          |      | < 800 µg                                | 134 (41)    | 83 (35.6)                    |                                         |                                   | 1.6 (0.8, 3.0)                    |
|                                                                          | Any  | 800 + µg                                | 33 (10.1)   | 24 (10.3)                    |                                         |                                   | 1.1 (0.6, 2.1)                    |
|                                                                          |      | < 800 µg                                | 33 (10.1)   | 14 (6.0)                     |                                         |                                   | 3.2 (1.3, 7.6)                    |

Abbreviations: CI, confidence interval; OR, odds ratio.

<sup>a</sup> During the period 3 months before or after conception.

<sup>b</sup> Average daily intake during first month of pregnancy.

<sup>c</sup> ORs adjusted for home ownership, child's birth year, study region, race/ethnicity, insurance type, and maternal age, birthplace, education, smoking, intake of vitamins A (natural log), C (natural log), D (natural log), B6, and B12, and calcium in pregnancy month 1, and consumption of an iron supplement in month 6.

**TABLE S3.** Combinations of Household Pesticide Exposure Including Flea and Tick Pet Collars and Maternal Folic Acid Intake the First Month of Pregnancy in Relation to Risk for Autism Spectrum Disorders (ASD)

| Pesticide Exposure During Pregnancy |                                           | Maternal Folic Acid Intake <sup>a</sup> | ASD No. (%) | Typically Developing No. (%) | Expected Joint OR: Multiplicative Model <sup>b</sup> | Expected Joint OR: Additive Model <sup>c</sup> | OR <sup>d</sup> (95% CI) |
|-------------------------------------|-------------------------------------------|-----------------------------------------|-------------|------------------------------|------------------------------------------------------|------------------------------------------------|--------------------------|
| Pet Flea and Tick Products          | None                                      | 800 + µg                                | 126 (36.1)  | 116 (45.3)                   |                                                      |                                                | 1.0                      |
|                                     |                                           | < 800 µg                                | 146 (41.8)  | 90 (35.2)                    |                                                      |                                                | 1.4 (0.8, 2.4)           |
|                                     | Some <sup>e</sup><br>Regular <sup>f</sup> | 800 + µg                                | 8 (2.3)     | 10 (3.9)                     |                                                      |                                                | 0.9 (0.3, 2.4)           |
|                                     |                                           | < 800 µg                                | 9 (2.6)     | 10 (3.9)                     | 1.3                                                  | 1.3                                            | 0.9 (0.3, 2.5)           |
|                                     |                                           | 800 + µg                                | 34 (9.7)    | 22 (8.6)                     |                                                      |                                                | 1.4 (0.8, 2.6)           |
|                                     |                                           | < 800 µg                                | 26 (7.5)    | 8 (3.1)                      | 1.3                                                  | 1.8                                            | 2.8 (1.1, 6.9)           |
| Any Indoor <sup>g</sup> Pesticides  | None                                      | 800 + µg                                | 80 (24.2)   | 90 (36.7)                    |                                                      |                                                | 1.0                      |
|                                     |                                           | < 800 µg                                | 98 (29.6)   | 72 (29.4)                    |                                                      |                                                | 1.2 (0.7, 2.2)           |
|                                     | Any                                       | 800 + µg                                | 78 (23.6)   | 51 (20.8)                    |                                                      |                                                | 1.7 (1.1, 2.8)           |
|                                     |                                           | < 800 µg                                | 75 (22.7)   | 32 (13.1)                    | 2.0                                                  | 1.9                                            | 2.3 (1.2, 4.4)           |

Abbreviations: CI, confidence interval; OR, odds ratio.

<sup>a</sup> Average daily intake during first month of pregnancy.

<sup>b</sup> Expected combined OR for multiplicative model calculated as the product of the ORs for no pesticide exposure and folic acid < 800 µg, pesticide exposure and folic acid 800+ µg.

<sup>c</sup> Expected combined OR for additive model calculated as 1 + (the OR for no pesticide exposure and folic acid < 800 µg - 1) + (the OR for pesticide exposure and folic acid 800+ µg - 1).

<sup>d</sup> ORs adjusted for home ownership, child's birth year, and maternal vitamin B6 and vitamin D (natural log) intake during the first month of pregnancy.

<sup>e</sup> Exposure to pesticides reported for <6 months of pregnancy.

<sup>f</sup> Exposure to pesticides reported for 6+ months of pregnancy.

<sup>g</sup> Maternally-reported exposure to professionally- or self-applied pesticide sprays or foggers, or pet pesticides (flea/tick shampoos, pouches, and collars), inside the home during pregnancy.

**TABLE S4.** Combinations of Household Pesticide Exposure and Maternal Folic Acid Intake the First Month of Pregnancy in Relation to Risk for Autism Spectrum Disorders (ASD) with Folic Acid (FA) Dichotomized at 600 µg

| Pesticide Exposure During Pregnancy |                      | Maternal Folic Acid Intake <sup>a</sup> | ASD No. (%) | Typically Developing No. (%) | Expected Joint OR: Multiplicative Model | Expected Joint OR: Additive Model | OR <sup>b</sup> (95% CI) |
|-------------------------------------|----------------------|-----------------------------------------|-------------|------------------------------|-----------------------------------------|-----------------------------------|--------------------------|
| Indoor Sprays or Foggers            | None                 | 600 + µg                                | 117 (35.5)  | 124 (50)                     |                                         |                                   | 1.0                      |
|                                     |                      | < 600 µg                                | 110 (33.3)  | 76 (30.7)                    |                                         |                                   | 1.4 (0.8, 2.5)           |
|                                     | Any                  | 600 + µg                                | 55 (16.7)   | 29 (11.7)                    |                                         |                                   | 2.0 (1.2, 3.4)           |
|                                     |                      | < 600 µg                                | 48 (14.6)   | 19 (7.7)                     | 2.8                                     | 2.4                               | 2.6 (1.3, 5.3)           |
| Pet Flea and Tick Products          | None                 | 600 + µg                                | 141 (40.3)  | 128 (50)                     |                                         |                                   | 1.0                      |
|                                     |                      | < 600 µg                                | 135 (38.6)  | 85 (33.2)                    |                                         |                                   | 1.4 (0.8, 2.5)           |
|                                     | Some <sup>c</sup>    | 600 + µg                                | 9 (2.6)     | 13 (5.1)                     |                                         |                                   | 0.8 (0.3, 2)             |
|                                     |                      | < 600 µg                                | 7 (2.0)     | 7 (2.7)                      | 1.1                                     | 1.2                               | 1 (0.3, 3.2)             |
|                                     | Regular <sup>d</sup> | 600 + µg                                | 36 (10.3)   | 18 (7.0)                     |                                         |                                   | 1.8 (0.9, 3.3)           |
|                                     |                      | < 600 µg                                | 22 (6.3)    | 5 (2.0)                      | 2.5                                     | 2.2                               | 3.5 (1.2, 10.5)          |
| Any Indoor <sup>e</sup> Pesticides  | None                 | 600 + µg                                | 89 (26.8)   | 97 (39.8)                    |                                         |                                   | 1.0                      |
|                                     |                      | < 600 µg                                | 92 (27.7)   | 68 (27.9)                    |                                         |                                   | 1.2 (0.7, 2.3)           |
|                                     | Any                  | 600 + µg                                | 85 (25.6)   | 53 (21.7)                    |                                         |                                   | 1.8 (1.1, 2.8)           |
|                                     |                      | < 600 µg                                | 66 (19.9)   | 26 (10.7)                    | 2.2                                     | 2.0                               | 2.5 (1.3, 4.9)           |
| Outdoor Sprays or Foggers           | None                 | 600 + µg                                | 106 (34.1)  | 100 (42)                     |                                         |                                   | 1.0                      |
|                                     |                      | < 600 µg                                | 90 (28.9)   | 68 (28.6)                    |                                         |                                   | 1.1 (0.6, 2)             |
|                                     | Some <sup>c</sup>    | 600 + µg                                | 35 (11.3)   | 34 (14.3)                    |                                         |                                   | 1.3 (0.7, 2.4)           |
|                                     |                      | < 600 µg                                | 17 (5.5)    | 16 (6.7)                     | 1.4                                     | 1.4                               | 1.0 (0.4, 2.4)           |
|                                     | Regular <sup>d</sup> | 600 + µg                                | 28 (9.0)    | 13 (5.5)                     |                                         |                                   | 2.0 (0.9, 4.1)           |
|                                     |                      | < 600 µg                                | 35 (11.3)   | 7 (2.9)                      | 2.2                                     | 2.1                               | 4.0 (1.5, 10.4)          |
| Any Household Indoor or Outdoor     | None                 | 600 + µg                                | 68 (21.9)   | 71 (30.3)                    |                                         |                                   | 1.0                      |
|                                     |                      | < 600 µg                                | 71 (22.9)   | 54 (23.1)                    |                                         |                                   | 1.2 (0.6, 2.3)           |
|                                     | Any                  | 600 + µg                                | 97 (31.3)   | 71 (30.3)                    |                                         |                                   | 1.7 (1.0, 2.7)           |

|                                                |      |          |            |           |     |     |                |
|------------------------------------------------|------|----------|------------|-----------|-----|-----|----------------|
| Pesticides                                     |      | < 600 µg | 74 (23.9)  | 38 (16.2) | 2.0 | 1.9 | 2.0 (1.0, 3.8) |
| Any Household<br>or Agricultural<br>Pesticides | None | 600 + µg | 52 (18.3)  | 57 (26.6) |     |     | 1.0            |
|                                                |      | < 600 µg | 55 (19.3)  | 41 (19.2) |     |     | 1.3 (0.6, 2.7) |
| Pesticides                                     | Any  | 600 + µg | 103 (36.1) | 74 (34.6) |     |     | 1.8 (1.1, 3)   |
|                                                |      | < 600 µg | 75 (26.3)  | 42 (19.6) | 2.3 | 2.1 | 2.1 (1.1, 4.2) |

Abbreviations: CI, confidence interval; OR, odds ratio.

<sup>a</sup> Average daily intake during first month of pregnancy.

<sup>b</sup> ORs adjusted for home ownership, child's birth year, and maternal vitamin B6 and vitamin D (natural log) intake during the first month of pregnancy.

<sup>c</sup> Exposure to pesticides reported for <6 months of pregnancy.

<sup>d</sup> Exposure to pesticides reported for 6+ months of pregnancy.

<sup>e</sup> Maternally-reported exposure to professionally- or self-applied pesticide sprays or foggers, or pet pesticides (flea/tick shampoos, pouches, not collars), inside the home during pregnancy.



**TABLE S5.** Combinations of Agricultural Pesticide Exposure and Maternal Folic Acid Intake the First Month of Pregnancy in Relation to Risk for Autism Spectrum Disorders (ASD) with Folic Acid (FA) Dichotomized at 600 µg

| Periconceptional Agricultural/Commercial Pesticide Exposure <sup>a</sup> |      | Maternal Folic Acid Intake <sup>b</sup> | ASD No. (%) | Typically Developing No. (%) | Expected Joint OR: Multiplicative Model | Expected Joint OR: Additive Model | Observed OR <sup>c</sup> (95% CI) |
|--------------------------------------------------------------------------|------|-----------------------------------------|-------------|------------------------------|-----------------------------------------|-----------------------------------|-----------------------------------|
| Chlorpyrifos                                                             | None | 600 + µg                                | 174 (49.9)  | 141 (56.4)                   | 1.4                                     | 1.4                               | 1.0                               |
|                                                                          |      | < 600 µg                                | 150 (43)    | 92 (36.8)                    |                                         |                                   | 1.4 (0.8, 2.3)                    |
|                                                                          | Any  | 600 + µg                                | 13 (3.7)    | 12 (4.8)                     |                                         |                                   | 1.0 (0.4, 2.4)                    |
|                                                                          |      | < 600 µg                                | 12 (3.4)    | 5 (2.0)                      |                                         |                                   | 2.6 (0.8, 8.3)                    |
| Organophosphates                                                         | None | 600 + µg                                | 158 (45.3)  | 129 (51.6)                   | 1.2                                     | 1.2                               | 1.0                               |
|                                                                          |      | < 600 µg                                | 137 (39.3)  | 87 (34.8)                    |                                         |                                   | 1.3 (0.7, 2.2)                    |
|                                                                          | Any  | 600 + µg                                | 29 (8.3)    | 24 (9.6)                     |                                         |                                   | 0.9 (0.5, 1.7)                    |
|                                                                          |      | < 600 µg                                | 25 (7.2)    | 10 (4.0)                     |                                         |                                   | 2.3 (1.0, 5.7)                    |
| Pyrethroids                                                              | None | 600 + µg                                | 162 (46.4)  | 134 (53.6)                   | 1.4                                     | 1.4                               | 1.0                               |
|                                                                          |      | < 600 µg                                | 140 (40.1)  | 86 (34.4)                    |                                         |                                   | 1.3 (0.8, 2.3)                    |
|                                                                          | Any  | 600 + µg                                | 25 (7.2)    | 19 (7.6)                     |                                         |                                   | 1.1 (0.6, 2.1)                    |
|                                                                          |      | < 600 µg                                | 22 (6.3)    | 11 (4.4)                     |                                         |                                   | 1.9 (0.8, 4.6)                    |
| Carbamates                                                               | None | 600 + µg                                | 175 (50.1)  | 148 (59.2)                   | 2.4                                     | 2.1                               | 1.0                               |
|                                                                          |      | < 600 µg                                | 154 (44.1)  | 92 (36.8)                    |                                         |                                   | 1.5 (0.8, 2.5)                    |
|                                                                          | Any  | 600 + µg                                | 12 (3.4)    | 5 (2.0)                      |                                         |                                   | 1.6 (0.5, 4.8)                    |
|                                                                          |      | < 600 µg                                | 8 (2.3)     | 5 (2.0)                      |                                         |                                   | 1.4 (0.4, 4.5)                    |
| Any Agricultural Pesticides                                              | None | 600 + µg                                | 149 (42.7)  | 126 (50.4)                   | 1.4                                     | 1.4                               | 1.0                               |
|                                                                          |      | < 600 µg                                | 133 (38.1)  | 82 (32.8)                    |                                         |                                   | 1.3 (0.8, 2.3)                    |
|                                                                          | Any  | 600 + µg                                | 38 (10.9)   | 27 (10.8)                    |                                         |                                   | 1.1 (0.6, 1.9)                    |
|                                                                          |      | < 600 µg                                | 29 (8.3)    | 15 (6.0)                     |                                         |                                   | 1.9 (0.9, 4.2)                    |

Abbreviations: CI, confidence interval; OR, odds ratio.

<sup>a</sup> During the period 3 months before or after conception.

<sup>b</sup> Average daily intake during first month of pregnancy.

<sup>c</sup> ORs adjusted for home ownership, child's birth year, and maternal vitamin B6 and vitamin D intake during the first month of pregnancy.

**TABLE S6.** Combinations of Agricultural Pesticide Exposure During Pregnancy and Maternal Folic Acid Intake the First Month of Pregnancy in Relation to Risk for Autism Spectrum Disorders (ASD)

| Agricultural/Commercial Pesticide Exposure During Pregnancy <sup>a</sup> |      | Maternal Folic Acid Intake <sup>b</sup> | ASD No. (%) | Typically Developing No. (%) | Expected Joint OR: Multiplicative Model | Expected Joint OR: Additive Model | Observed OR <sup>c</sup> (95% CI) | RERI (CI)        |
|--------------------------------------------------------------------------|------|-----------------------------------------|-------------|------------------------------|-----------------------------------------|-----------------------------------|-----------------------------------|------------------|
| Chlorpyrifos                                                             | None | 800 + µg                                | 158 (45.1)  | 130 (51.4)                   |                                         |                                   | 1.0                               |                  |
|                                                                          |      | < 800 µg                                | 164 (46.9)  | 104 (41.1)                   |                                         |                                   | 1.2 (0.8, 2.1)                    |                  |
|                                                                          | Any  | 800 + µg                                | 14 (4.0)    | 14 (5.5)                     |                                         |                                   | 0.9 (0.4, 2)                      |                  |
|                                                                          |      | < 800 µg                                | 14 (4.0)    | 5 (2.0)                      | 1.1                                     | 1.1                               | 2.3 (0.7, 7.3)                    | 1.2 (-1.4, 3.8)  |
| Organophosphates                                                         | None | 800 + µg                                | 141 (40.3)  | 116 (45.9)                   |                                         |                                   | 1.0                               |                  |
|                                                                          |      | < 800 µg                                | 140 (40.0)  | 92 (36.4)                    |                                         |                                   | 1.2 (0.7, 1.9)                    |                  |
|                                                                          | Any  | 800 + µg                                | 31 (8.9)    | 28 (11.1)                    |                                         |                                   | 0.9 (0.5, 1.7)                    |                  |
|                                                                          |      | < 800 µg                                | 38 (10.9)   | 17 (6.7)                     | 1.1                                     | 1.1                               | 2.0 (1, 4.3)                      | 1.0 (-0.4, 2.4)  |
| Pyrethroids                                                              | None | 800 + µg                                | 148 (42.3)  | 118 (46.6)                   |                                         |                                   | 1.0                               |                  |
|                                                                          |      | < 800 µg                                | 152 (43.4)  | 93 (36.8)                    |                                         |                                   | 1.2 (0.7, 2)                      |                  |
|                                                                          | Any  | 800 + µg                                | 24 (6.9)    | 26 (10.3)                    |                                         |                                   | 0.7 (0.4, 1.3)                    |                  |
|                                                                          |      | < 800 µg                                | 26 (7.4)    | 16 (6.3)                     | 0.8                                     | 0.9                               | 1.4 (0.7, 3.1)                    | 0.5 (-0.5, 1.6)  |
| Carbamates                                                               | None | 800 + µg                                | 157 (44.9)  | 137 (54.2)                   |                                         |                                   | 1.0                               |                  |
|                                                                          |      | < 800 µg                                | 166 (47.4)  | 103 (40.7)                   |                                         |                                   | 1.3 (0.8, 2.2)                    |                  |
|                                                                          | Any  | 800 + µg                                | 15 (4.3)    | 7 (2.8)                      |                                         |                                   | 1.6 (0.6, 4.2)                    |                  |
|                                                                          |      | < 800 µg                                | 12 (3.4)    | 6 (2.4)                      | 2.1                                     | 1.9                               | 1.7 (0.6, 5.1)                    | -0.2 (-2.6, 2.1) |
| Any Agricultural Pesticides                                              | None | 800 + µg                                | 131 (37.4)  | 107 (42.3)                   |                                         |                                   | 1.0                               |                  |
|                                                                          |      | < 800 µg                                | 137 (39.1)  | 87 (34.4)                    |                                         |                                   | 1.2 (0.7, 2)                      |                  |
|                                                                          | Any  | 800 + µg                                | 41 (11.7)   | 37 (14.6)                    |                                         |                                   | 0.9 (0.5, 1.5)                    |                  |
|                                                                          |      | < 800 µg                                | 41 (11.7)   | 22 (8.7)                     | 1.1                                     | 1.1                               | 1.7 (0.8, 3.4)                    | 0.6 (-0.4, 1.7)  |

Abbreviations: CI, confidence interval; OR, odds ratio.

<sup>a</sup> Any exposure during pregnancy using 1250 m buffer.

<sup>b</sup> Average daily intake during first month of pregnancy.

<sup>c</sup> ORs adjusted for home ownership, child's birth year, and maternal vitamin B6 and vitamin D (natural log) intake during the first month of pregnancy.

**TABLE S7.** Combinations of Agricultural Pesticide Exposure and Maternal Folic Acid Intake the First Month of Pregnancy in Relation to Risk for Autism Spectrum Disorders (ASD) using a 1500 m Buffer

| Periconceptual Agricultural/Commercial Pesticide Exposure <sup>a</sup> |      | Maternal Folic Acid Intake <sup>b</sup> | ASD No. (%) | Typically Developing No. (%) | Expected Joint OR: Multiplicative Model | Expected Joint OR: Additive Model | Observed OR <sup>c</sup> (95% CI) |
|------------------------------------------------------------------------|------|-----------------------------------------|-------------|------------------------------|-----------------------------------------|-----------------------------------|-----------------------------------|
| Chlorpyrifos                                                           | None | 800 + µg                                | 155 (44.4)  | 126 (50.4)                   |                                         |                                   | 1.0                               |
|                                                                        |      | < 800 µg                                | 160 (45.9)  | 97 (38.8)                    |                                         |                                   | 1.3 (0.8, 2.1)                    |
|                                                                        | Any  | 800 + µg                                | 16 (4.6)    | 17 (6.8)                     |                                         |                                   | 0.9 (0.4, 1.8)                    |
|                                                                        |      | < 800 µg                                | 18 (5.2)    | 10 (4.0)                     | 1.2                                     | 1.2                               | 1.7 (0.7, 4.1)                    |
| Organophosphates                                                       | None | 800 + µg                                | 135 (38.7)  | 112 (44.8)                   |                                         |                                   | 1.0                               |
|                                                                        |      | < 800 µg                                | 140 (40.1)  | 88 (35.2)                    |                                         |                                   | 1.2 (0.7, 2.1)                    |
|                                                                        | Any  | 800 + µg                                | 36 (10.3)   | 31 (12.4)                    |                                         |                                   | 0.9 (0.5, 1.5)                    |
|                                                                        |      | < 800 µg                                | 38 (10.9)   | 19 (7.6)                     | 1.1                                     | 1.1                               | 1.6 (0.8, 3.3)                    |
| Pyrethroids                                                            | None | 800 + µg                                | 142 (40.7)  | 119 (47.6)                   |                                         |                                   | 1.0                               |
|                                                                        |      | < 800 µg                                | 145 (41.6)  | 90 (36)                      |                                         |                                   | 1.3 (0.7, 2.1)                    |
|                                                                        | Any  | 800 + µg                                | 29 (8.3)    | 24 (9.6)                     |                                         |                                   | 1.0 (0.5, 1.8)                    |
|                                                                        |      | < 800 µg                                | 33 (9.5)    | 17 (6.8)                     | 1.3                                     | 1.3                               | 1.8 (0.8, 3.7)                    |
| Carbamates                                                             | None | 800 + µg                                | 158 (45.3)  | 136 (54.4)                   |                                         |                                   | 1.0                               |
|                                                                        |      | < 800 µg                                | 166 (47.6)  | 101 (40.4)                   |                                         |                                   | 1.3 (0.8, 2.2)                    |
|                                                                        | Any  | 800 + µg                                | 13 (3.7)    | 7 (2.8)                      |                                         |                                   | 1.4 (0.5, 3.6)                    |
|                                                                        |      | < 800 µg                                | 12 (3.4)    | 6 (2.4)                      | 1.8                                     | 1.7                               | 1.6 (0.5, 4.7)                    |
| Any Agricultural Pesticides                                            | None | 800 + µg                                | 126 (36.1)  | 109 (43.6)                   |                                         |                                   | 1.0                               |
|                                                                        |      | < 800 µg                                | 133 (38.1)  | 83 (33.2)                    |                                         |                                   | 1.2 (0.7, 2.1)                    |
|                                                                        | Any  | 800 + µg                                | 45 (12.9)   | 34 (13.6)                    |                                         |                                   | 1.0 (0.6, 1.7)                    |
|                                                                        |      | < 800 µg                                | 45 (12.9)   | 24 (9.6)                     | 1.2                                     | 1.2                               | 1.6 (0.8, 3.1)                    |

Abbreviations: CI, confidence interval; OR, odds ratio.

<sup>a</sup> During the period 3 months before or after conception.

<sup>b</sup> Average daily intake during first month of pregnancy.

<sup>c</sup> ORs adjusted for home ownership, child's birth year, and maternal vitamin D (natural log), vitamin B6, and folic acid intake during the first month of pregnancy.

**TABLE S8.** Combinations of Agricultural Pesticide Exposure and Maternal Folic Acid Intake the First Month of Pregnancy in Relation to Risk for Autism Spectrum Disorders (ASD) using a 1750 m Buffer

| Periconceptual Agricultural/Commercial Pesticide Exposure <sup>a</sup> |      | Maternal Folic Acid Intake <sup>b</sup> | ASD No. (%) | Typically Developing No. (%) | Expected Joint OR: Multiplicative Model | Expected Joint OR: Additive Model | Observed OR <sup>c</sup> (95% CI) |
|------------------------------------------------------------------------|------|-----------------------------------------|-------------|------------------------------|-----------------------------------------|-----------------------------------|-----------------------------------|
| Chlorpyrifos                                                           | None | 800 + µg                                | 152 (43.6)  | 122 (48.8)                   |                                         |                                   | 1.0                               |
|                                                                        |      | < 800 µg                                | 156 (44.7)  | 95 (38.0)                    |                                         |                                   | 1.3 (0.7, 2.1)                    |
|                                                                        | Any  | 800 + µg                                | 19 (5.4)    | 21 (8.4)                     |                                         |                                   | 0.8 (0.4, 1.6)                    |
|                                                                        |      | < 800 µg                                | 22 (6.3)    | 12 (4.8)                     | 1.0                                     | 1.1                               | 1.7 (0.7, 4.0)                    |
| Organophosphates                                                       | None | 800 + µg                                | 134 (38.4)  | 108 (43.2)                   |                                         |                                   | 1.0                               |
|                                                                        |      | < 800 µg                                | 135 (38.7)  | 81 (32.4)                    |                                         |                                   | 1.3 (0.7, 2.1)                    |
|                                                                        | Any  | 800 + µg                                | 37 (10.6)   | 35 (14.0)                    |                                         |                                   | 0.8 (0.4, 1.3)                    |
|                                                                        |      | < 800 µg                                | 43 (12.3)   | 26 (10.4)                    | 1.0                                     | 1.1                               | 1.3 (0.7, 2.5)                    |
| Pyrethroids                                                            | None | 800 + µg                                | 139 (39.8)  | 116 (46.4)                   |                                         |                                   | 1.0                               |
|                                                                        |      | < 800 µg                                | 140 (40.1)  | 85 (34.0)                    |                                         |                                   | 1.3 (0.8, 2.2)                    |
|                                                                        | Any  | 800 + µg                                | 32 (9.2)    | 27 (10.8)                    |                                         |                                   | 1.0 (0.5, 1.7)                    |
|                                                                        |      | < 800 µg                                | 38 (10.9)   | 22 (8.8)                     | 1.3                                     | 1.3                               | 1.5 (0.7, 2.9)                    |
| Carbamates                                                             | None | 800 + µg                                | 155 (44.4)  | 135 (54)                     |                                         |                                   | 1.0                               |
|                                                                        |      | < 800 µg                                | 164 (47.0)  | 97 (38.8)                    |                                         |                                   | 1.4 (0.9, 2.4)                    |
|                                                                        | Any  | 800 + µg                                | 16 (4.6)    | 8 (3.2)                      |                                         |                                   | 1.5 (0.6, 3.8)                    |
|                                                                        |      | < 800 µg                                | 14 (4.0)    | 10 (4.0)                     | 2.1                                     | 1.9                               | 1.1 (0.4, 2.7)                    |
| Any Agricultural Pesticides                                            | None | 800 + µg                                | 124 (35.5)  | 103 (41.2)                   |                                         |                                   | 1.0                               |
|                                                                        |      | < 800 µg                                | 128 (36.7)  | 75 (30.0)                    |                                         |                                   | 1.3 (0.8, 2.3)                    |
|                                                                        | Any  | 800 + µg                                | 47 (13.5)   | 40 (16.0)                    |                                         |                                   | 0.9 (0.5, 1.4)                    |
|                                                                        |      | < 800 µg                                | 50 (14.3)   | 32 (12.8)                    | 1.2                                     | 1.2                               | 1.2 (0.7, 2.3)                    |

Abbreviations: CI, confidence interval; OR, odds ratio.

<sup>a</sup> During the period 3 months before or after conception.

<sup>b</sup> Average daily intake during first month of pregnancy.

<sup>c</sup> ORs adjusted for home ownership, child's birth year, and maternal vitamin D (natural log), vitamin B6, and folic acid intake during the first month of pregnancy.

**TABLE S9.** AIC<sup>a</sup> for Assessing Goodness of Fit for Models with and without Multiplicative Interaction Terms

| Exposure                                   | Without Interaction Term <sup>b</sup> | With Interaction Term <sup>b,c</sup> |
|--------------------------------------------|---------------------------------------|--------------------------------------|
| <u>Household Pesticides</u>                |                                       |                                      |
| Indoor Sprays/Foggers                      | 750.1                                 | 752.1                                |
| Pet Flea/Tick Products                     | 816.1                                 | 817.9                                |
| Any Indoor Pesticides                      | 746.5                                 | 748.2                                |
| Outdoor Sprays/Foggers                     | 746.7                                 | 748.7                                |
| <u>Agricultural Pesticides<sup>d</sup></u> |                                       |                                      |
| Chlorpyrifos                               | 786.0                                 | 787.6                                |
| Organophosphates                           | 786.1                                 | 785.5                                |
| Pyrethroids                                | 786.0                                 | 786.6                                |
| Carbamates                                 | 786.2                                 | 788.1                                |

<sup>a</sup> Akaike Information Criterion; lower AIC indicates better-fitting model.

<sup>b</sup> Models included pesticide exposure, maternal folic acid intake in first month of pregnancy (<800 µg), home ownership, child's birth year, and maternal vitamin B6 and vitamin D (natural log) intake during the first month of pregnancy.

<sup>c</sup> Models included product term maternal folic acid intake in first month of pregnancy (<800 µg)\*Pesticide exposure.

<sup>d</sup> Agricultural exposure during the period 3 months before or after conception.

**TABLE S10.** Combinations of Household Pesticide Exposure and Maternal Vitamin B12 Intake the First Month of Pregnancy in Relation to Risk for Autism Spectrum Disorders (ASD)

| Pesticide Exposure During Pregnancy        |                      | Maternal Vitamin B12 Intake <sup>a</sup> | ASD No. (%) | Typically Developing No. (%) | Expected Joint OR: Multiplicative Model <sup>b</sup> | Expected Joint OR: Additive Model <sup>c</sup> | OR <sup>d</sup> (95% CI) |
|--------------------------------------------|----------------------|------------------------------------------|-------------|------------------------------|------------------------------------------------------|------------------------------------------------|--------------------------|
| Indoor Sprays or Foggers                   | None                 | 8 + µg                                   | 114 (34.7)  | 112 (45.2)                   |                                                      |                                                | 1.0                      |
|                                            |                      | < 8 µg                                   | 112 (34)    | 88 (35.5)                    |                                                      |                                                | 0.9 (0.5, 1.6)           |
|                                            | Any                  | 8 + µg                                   | 46 (14)     | 28 (11.3)                    |                                                      |                                                | 1.6 (0.9, 2.9)           |
|                                            |                      | < 8 µg                                   | 57 (17.3)   | 20 (8.1)                     | 1.4                                                  | 1.5                                            | 2.1 (1.1, 4.3)           |
| Pet Flea and Tick Products                 | None                 | 8 + µg                                   | 127 (36.4)  | 116 (45.3)                   |                                                      |                                                | 1.0                      |
|                                            |                      | < 8 µg                                   | 148 (42.4)  | 97 (37.9)                    |                                                      |                                                | 1.2 (0.7, 2)             |
|                                            | Some <sup>e</sup>    | 8 + µg                                   | 8 (2.3)     | 13 (5.1)                     |                                                      |                                                | 0.7 (0.3, 1.9)           |
|                                            |                      | < 8 µg                                   | 8 (2.3)     | 7 (2.7)                      | 0.8                                                  | 0.9                                            | 0.9 (0.3, 2.9)           |
|                                            | Regular <sup>f</sup> | 8 + µg                                   | 35 (10.0)   | 17 (6.6)                     |                                                      |                                                | 1.7 (0.9, 3.2)           |
|                                            |                      | < 8 µg                                   | 23 (6.6)    | 6 (2.3)                      | 1.5                                                  | 1.9                                            | 3.0 (1.1, 8.4)           |
| Any Indoor <sup>g</sup> Pesticides         | None                 | 8 + µg                                   | 85 (25.7)   | 87 (35.7)                    |                                                      |                                                | 1.0                      |
|                                            |                      | < 8 µg                                   | 95 (28.7)   | 78 (32)                      |                                                      |                                                | 0.9 (0.5, 1.7)           |
|                                            | Any                  | 8 + µg                                   | 76 (23)     | 51 (20.9)                    |                                                      |                                                | 1.5 (0.9, 2.5)           |
|                                            |                      | < 8 µg                                   | 75 (22.7)   | 28 (11.5)                    | 1.4                                                  | 1.4                                            | 2.1 (1.1, 4.2)           |
| Outdoor Sprays or Foggers                  | None                 | 8 + µg                                   | 94 (30.3)   | 93 (39.1)                    |                                                      |                                                | 1.0                      |
|                                            |                      | < 8 µg                                   | 101 (32.6)  | 75 (31.5)                    |                                                      |                                                | 1 (0.5, 1.9)             |
|                                            | Some <sup>e</sup>    | 8 + µg                                   | 30 (9.7)    | 33 (13.9)                    |                                                      |                                                | 1.2 (0.7, 2.3)           |
|                                            |                      | < 8 µg                                   | 22 (7.1)    | 17 (7.1)                     | 1.2                                                  | 1.2                                            | 1.1 (0.5, 2.6)           |
|                                            | Regular <sup>f</sup> | 8 + µg                                   | 31 (10.0)   | 10 (4.2)                     |                                                      |                                                | 2.9 (1.3, 6.5)           |
|                                            |                      | < 8 µg                                   | 32 (10.3)   | 10 (4.2)                     | 3.2                                                  | 2.9                                            | 2.5 (1.0, 6)             |
| Any Household Indoor or Outdoor Pesticides | None                 | 8 + µg                                   | 62 (20.1)   | 65 (27.8)                    |                                                      |                                                | 1.0                      |
|                                            |                      | < 8 µg                                   | 76 (24.6)   | 60 (25.6)                    |                                                      |                                                | 1.1 (0.5, 2.2)           |
|                                            | Any                  | 8 + µg                                   | 89 (28.8)   | 68 (29.1)                    |                                                      |                                                | 1.6 (1.0, 2.6)           |
|                                            |                      | < 8 µg                                   | 82 (26.5)   | 41 (17.5)                    | 1.8                                                  | 1.7                                            | 2.0 (1.0, 3.9)           |



|                                                |      |                   |           |           |     |     |                |
|------------------------------------------------|------|-------------------|-----------|-----------|-----|-----|----------------|
| Any Household<br>or Agricultural<br>Pesticides | None | 8 + $\mu\text{g}$ | 48 (16.9) | 51 (23.8) |     |     | 1.0            |
|                                                |      | < 8 $\mu\text{g}$ | 58 (20.4) | 47 (22.0) |     |     | 1.1 (0.5, 2.4) |
|                                                | Any  | 8 + $\mu\text{g}$ | 94 (33.1) | 72 (33.6) |     |     | 1.6 (1.0, 2.7) |
|                                                |      | < 8 $\mu\text{g}$ | 84 (29.6) | 44 (20.6) | 1.8 | 1.7 | 2.1 (1.0, 4.4) |

Abbreviations: CI, confidence interval; OR, odds ratio.

<sup>a</sup> Average daily intake during first month of pregnancy. TD median for B12 = 8.00  $\mu\text{g}$ .

<sup>b</sup> Expected combined OR for multiplicative model calculated as the product of the ORs for no pesticide exposure and vitamin B12 < 8  $\mu\text{g}$ , pesticide exposure and B12 8+  $\mu\text{g}$ .

<sup>c</sup> Expected combined OR for additive model calculated as 1 + (the OR for no pesticide exposure and B12 < 8  $\mu\text{g}$  - 1) + (the OR for pesticide exposure and B12 8+  $\mu\text{g}$  - 1).

<sup>d</sup> ORs adjusted for home ownership, child's birth year, and maternal vitamin B6, vitamin D (natural log), and folic acid intake during the first month of pregnancy.

<sup>e</sup> Exposure to pesticides reported for <6 months of pregnancy.

<sup>f</sup> Exposure to pesticides reported for 6+ months of pregnancy.

<sup>g</sup> Maternally-reported exposure to professionally- or self-applied pesticide sprays or foggers, or pet pesticides (flea/tick shampoos, pouches, not collars), inside the home during pregnancy.

**TABLE S11.** Combinations of Agricultural Pesticide Exposure and Maternal Vitamin B12 Intake the First Month of Pregnancy in Relation to Risk for Autism Spectrum Disorders (ASD) using a 1250 m Buffer

| Periconceptual Agricultural/Commercial Pesticide Exposure <sup>a</sup> | Maternal Vitamin B12 Intake <sup>b</sup> | ASD No. (%) | Typically Developing No. (%) | Expected Joint OR: Multiplicative Model <sup>c</sup> | Expected Joint OR: Additive Model <sup>d</sup> | Observed OR <sup>e</sup> (95% CI) |
|------------------------------------------------------------------------|------------------------------------------|-------------|------------------------------|------------------------------------------------------|------------------------------------------------|-----------------------------------|
| Chlorpyrifos                                                           | None                                     | 8 + µg      | 163 (46.8)                   | 130 (52)                                             |                                                | 1.0                               |
|                                                                        |                                          | < 8 µg      | 160 (46)                     | 103 (41.2)                                           |                                                | 1.0 (0.6, 1.8)                    |
|                                                                        | Any                                      | 8 + µg      | 10 (2.9)                     | 11 (4.4)                                             |                                                | 0.9 (0.3, 2.2)                    |
|                                                                        |                                          | < 8 µg      | 15 (4.3)                     | 6 (2.4)                                              | 0.9                                            | 0.9                               |
| Organophosphates                                                       | None                                     | 8 + µg      | 146 (42)                     | 120 (48)                                             |                                                | 1.0                               |
|                                                                        |                                          | < 8 µg      | 148 (42.5)                   | 96 (38.4)                                            |                                                | 1.0 (0.6, 1.8)                    |
|                                                                        | Any                                      | 8 + µg      | 27 (7.8)                     | 21 (8.4)                                             |                                                | 1.0 (0.5, 1.9)                    |
|                                                                        |                                          | < 8 µg      | 27 (7.8)                     | 13 (5.2)                                             | 1.0                                            | 1.0                               |
| Pyrethroids                                                            | None                                     | 8 + µg      | 147 (42.2)                   | 123 (49.2)                                           |                                                | 1.0                               |
|                                                                        |                                          | < 8 µg      | 154 (44.3)                   | 97 (38.8)                                            |                                                | 1.1 (0.6, 1.9)                    |
|                                                                        | Any                                      | 8 + µg      | 26 (7.5)                     | 18 (7.2)                                             |                                                | 1.2 (0.6, 2.4)                    |
|                                                                        |                                          | < 8 µg      | 21 (6)                       | 12 (4.8)                                             | 1.3                                            | 1.3                               |
| Carbamates                                                             | None                                     | 8 + µg      | 161 (46.3)                   | 136 (54.4)                                           |                                                | 1.0                               |
|                                                                        |                                          | < 8 µg      | 167 (48)                     | 104 (41.6)                                           |                                                | 1.2 (0.7, 2)                      |
|                                                                        | Any                                      | 8 + µg      | 12 (3.5)                     | 5 (2)                                                |                                                | 1.6 (0.6, 4.9)                    |
|                                                                        |                                          | < 8 µg      | 8 (2.3)                      | 5 (2)                                                | 1.9                                            | 1.8                               |
| Any Agricultural Pesticides                                            | None                                     | 8 + µg      | 136 (39.1)                   | 117 (46.8)                                           |                                                | 1.0                               |
|                                                                        |                                          | < 8 µg      | 145 (41.7)                   | 91 (36.4)                                            |                                                | 1.1 (0.6, 1.9)                    |
|                                                                        | Any                                      | 8 + µg      | 37 (10.6)                    | 24 (9.6)                                             |                                                | 1.2 (0.7, 2.2)                    |
|                                                                        |                                          | < 8 µg      | 30 (8.6)                     | 18 (7.2)                                             | 1.3                                            | 1.3                               |

Abbreviations: CI, confidence interval; OR, odds ratio.

<sup>a</sup> During the period 3 months before or after conception.

<sup>b</sup> Average daily intake during first month of pregnancy. TD median for B12 = 8.00.

- <sup>c</sup> Expected combined OR for multiplicative model calculated as the product of the ORs for no pesticide exposure and B12 < 8 μg, pesticide exposure and B12 8+ μg.
- <sup>d</sup> Expected combined OR for additive model calculated as 1 + (the OR for no pesticide exposure and B12 < 8 μg - 1) + (the OR for pesticide exposure and B12 8+ μg - 1).
- <sup>e</sup> ORs adjusted for home ownership, child's birth year, and maternal vitamin B6, vitamin D (natural log), and folic acid intake during the first month of pregnancy.

**TABLE S12.** Combinations of Household Pesticide Exposure and Maternal Vitamin B6 Intake the First Month of Pregnancy in Relation to Risk for Autism Spectrum Disorders (ASD)

| Pesticide Exposure During Pregnancy |                      | Maternal Vitamin B6 Intake <sup>a</sup> | ASD No. (%) | Typically Developing No. (%) | Expected Joint OR: Multiplicative Model <sup>b</sup> | Expected Joint OR: Additive Model <sup>c</sup> | OR <sup>d</sup> (95% CI) |
|-------------------------------------|----------------------|-----------------------------------------|-------------|------------------------------|------------------------------------------------------|------------------------------------------------|--------------------------|
| Indoor Sprays or Foggers            | None                 | 2.83 + mg                               | 90 (27.3)   | 98 (39.5)                    |                                                      |                                                | 1.0                      |
|                                     |                      | < 2.83 mg                               | 137 (41.5)  | 102 (41.1)                   |                                                      |                                                | 1.2 (0.7, 2)             |
|                                     | Any                  | 2.83 + mg                               | 44 (13.3)   | 25 (10.1)                    |                                                      |                                                | 2.0 (1.1, 3.5)           |
|                                     |                      | < 2.83 mg                               | 59 (17.9)   | 23 (9.3)                     | 2.4                                                  | 2.2                                            | 2.3 (1.2, 4.5)           |
| Pet Flea and Tick Products          | None                 | 2.83 + mg                               | 107 (30.6)  | 102 (39.8)                   |                                                      |                                                | 1.0                      |
|                                     |                      | < 2.83 mg                               | 169 (48.3)  | 111 (43.4)                   |                                                      |                                                | 1.2 (0.7, 1.9)           |
|                                     | Some <sup>e</sup>    | 2.83 + mg                               | 5 (1.4)     | 12 (4.7)                     |                                                      |                                                | 0.6 (0.2, 1.7)           |
|                                     |                      | < 2.83 mg                               | 11 (3.1)    | 8 (3.1)                      | 0.7                                                  | 0.8                                            | 1.2 (0.4, 3.3)           |
|                                     | Regular <sup>f</sup> | 2.83 + mg                               | 32 (9.1)    | 12 (4.7)                     |                                                      |                                                | 2.4 (1.1, 5)             |
|                                     |                      | < 2.83 mg                               | 26 (7.4)    | 11 (4.3)                     | 2.9                                                  | 2.6                                            | 1.8 (0.8, 4.1)           |
| Any Indoor <sup>g</sup> Pesticides  | None                 | 2.83 + mg                               | 66 (19.9)   | 77 (31.6)                    |                                                      |                                                | 1.0                      |
|                                     |                      | < 2.83 mg                               | 115 (34.6)  | 88 (36.1)                    |                                                      |                                                | 1.1 (0.6, 2)             |
|                                     | Any                  | 2.83 + mg                               | 71 (21.4)   | 42 (17.2)                    |                                                      |                                                | 2.0 (1.2, 3.4)           |
|                                     |                      | < 2.83 mg                               | 80 (24.1)   | 37 (15.2)                    | 2.2                                                  | 2.1                                            | 2.0 (1.1, 3.7)           |
| Outdoor Sprays or Foggers           | None                 | 2.83 + mg                               | 75 (24.1)   | 80 (33.6)                    |                                                      |                                                | 1.0                      |
|                                     |                      | < 2.83 mg                               | 121 (38.9)  | 88 (37)                      |                                                      |                                                | 1.3 (0.8, 2.3)           |
|                                     | Some <sup>e</sup>    | 2.83 + mg                               | 26 (8.4)    | 27 (11.3)                    |                                                      |                                                | 1.3 (0.7, 2.5)           |
|                                     |                      | < 2.83 mg                               | 26 (8.4)    | 23 (9.7)                     | 1.7                                                  | 1.6                                            | 1.3 (0.6, 2.7)           |
|                                     | Regular <sup>f</sup> | 2.83 + mg                               | 28 (9.0)    | 12 (5.0)                     |                                                      |                                                | 2.4 (1.1, 5.2)           |
|                                     |                      | < 2.83 mg                               | 35 (11.3)   | 8 (3.4)                      | 3.1                                                  | 2.7                                            | 4.2 (1.7, 10.7)          |
| Any Household Indoor or Outdoor     | None                 | 2.83 + mg                               | 46 (14.8)   | 60 (25.6)                    |                                                      |                                                | 1.0                      |
|                                     |                      | < 2.83 mg                               | 93 (30.0)   | 65 (27.8)                    |                                                      |                                                | 1.6 (0.9, 3)             |
|                                     | Any                  | 2.83 + mg                               | 83 (26.8)   | 57 (24.4)                    |                                                      |                                                | 2.1 (1.3, 3.7)           |

|                                                |      |           |           |           |     |     |                |
|------------------------------------------------|------|-----------|-----------|-----------|-----|-----|----------------|
| Pesticides                                     |      | < 2.83 mg | 88 (28.4) | 52 (22.2) | 3.4 | 2.7 | 2.2 (1.2, 4.1) |
| Any Household<br>or Agricultural<br>Pesticides | None | 2.83 + mg | 35 (12.3) | 46 (21.5) |     |     | 1.0            |
|                                                |      | < 2.83 mg | 72 (25.3) | 52 (24.3) |     |     | 1.7 (0.8, 3.3) |
|                                                | Any  | 2.83 + mg | 86 (30.2) | 62 (29.0) |     |     | 2.2 (1.2, 3.8) |
|                                                |      | < 2.83 mg | 92 (32.3) | 54 (25.2) | 3.7 | 2.9 | 2.5 (1.3, 4.8) |

Abbreviations: CI, confidence interval; OR, odds ratio.

<sup>a</sup> Average daily intake during first month of pregnancy. TD median for B6 = 2.83 mg.

<sup>b</sup> Expected combined OR for multiplicative model calculated as the product of the ORs for no pesticide exposure and vitamin B6 < 2.83 mg, pesticide exposure and B6 2.83+ mg.

<sup>c</sup> Expected combined OR for additive model calculated as 1 + (the OR for no pesticide exposure and B6 < 2.83 mg – 1) + (the OR for pesticide exposure and B6 2.83+ mg – 1).

<sup>d</sup> ORs adjusted for home ownership, child's birth year, and maternal vitamin D (natural log), and folic acid intake during the first month of pregnancy.

<sup>e</sup> Exposure to pesticides reported for <6 months of pregnancy.

<sup>f</sup> Exposure to pesticides reported for 6+ months of pregnancy.

<sup>g</sup> Maternally-reported exposure to professionally- or self-applied pesticide sprays or foggers, or pet pesticides (flea/tick shampoos, pouches, not collars), inside the home during pregnancy.

**TABLE S13.** Combinations of Agricultural Pesticide Exposure and Maternal Vitamin B6 Intake the First Month of Pregnancy in Relation to Risk for Autism Spectrum Disorders (ASD) using a 1250 m Buffer

| Periconceptual Agricultural/Commercial Pesticide Exposure <sup>a</sup> | Maternal Vitamin B6 Intake <sup>b</sup> | ASD No. (%) | Typically Developing No. (%) | Expected Joint OR: Multiplicative Model <sup>c</sup> | Expected Joint OR: Additive Model <sup>d</sup> | Observed OR <sup>e</sup> (95% CI) |
|------------------------------------------------------------------------|-----------------------------------------|-------------|------------------------------|------------------------------------------------------|------------------------------------------------|-----------------------------------|
| Chlorpyrifos                                                           | None                                    | 2.83 + mg   | 138 (39.5)                   | 113 (45.2)                                           |                                                | 1.0                               |
|                                                                        |                                         | < 2.83 mg   | 186 (53.3)                   | 120 (48)                                             |                                                | 1 (0.6, 1.7)                      |
|                                                                        | Any                                     | 2.83 + mg   | 9 (2.6)                      | 10 (4.0)                                             |                                                | 0.9 (0.3, 2.3)                    |
|                                                                        |                                         | < 2.83 mg   | 16 (4.6)                     | 7 (2.8)                                              | 0.9                                            | 0.9                               |
| Organophosphates                                                       | None                                    | 2.83 + mg   | 125 (35.8)                   | 103 (41.2)                                           |                                                | 1.0                               |
|                                                                        |                                         | < 2.83 mg   | 170 (48.7)                   | 113 (45.2)                                           |                                                | 1.0 (0.6, 1.7)                    |
|                                                                        | Any                                     | 2.83 + mg   | 22 (6.3)                     | 20 (8.0)                                             |                                                | 0.9 (0.5, 1.8)                    |
|                                                                        |                                         | < 2.83 mg   | 32 (9.2)                     | 14 (5.6)                                             | 0.9                                            | 0.9                               |
| Pyrethroids                                                            | None                                    | 2.83 + mg   | 125 (35.8)                   | 106 (42.4)                                           |                                                | 1.0                               |
|                                                                        |                                         | < 2.83 mg   | 177 (50.7)                   | 114 (45.6)                                           |                                                | 1.1 (0.7, 1.8)                    |
|                                                                        | Any                                     | 2.83 + mg   | 22 (6.3)                     | 17 (6.8)                                             |                                                | 1.2 (0.6, 2.3)                    |
|                                                                        |                                         | < 2.83 mg   | 25 (7.2)                     | 13 (5.2)                                             | 1.3                                            | 1.3                               |
| Carbamates                                                             | None                                    | 2.83 + mg   | 134 (38.4)                   | 120 (48)                                             |                                                | 1.0                               |
|                                                                        |                                         | < 2.83 mg   | 195 (55.9)                   | 120 (48)                                             |                                                | 1.2 (0.8, 2)                      |
|                                                                        | Any                                     | 2.83 + mg   | 13 (3.7)                     | 3 (1.2)                                              |                                                | 3.2 (0.9, 11.8)                   |
|                                                                        |                                         | < 2.83 mg   | 7 (2.0)                      | 7 (2.8)                                              | 3.8                                            | 3.4                               |
| Any Agricultural Pesticides                                            | None                                    | 2.83 + mg   | 116 (33.2)                   | 99 (39.6)                                            |                                                | 1.0                               |
|                                                                        |                                         | < 2.83 mg   | 166 (47.6)                   | 109 (43.6)                                           |                                                | 1.1 (0.6, 1.7)                    |
|                                                                        | Any                                     | 2.83 + mg   | 31 (8.9)                     | 24 (9.6)                                             |                                                | 1.1 (0.6, 2)                      |
|                                                                        |                                         | < 2.83 mg   | 36 (10.3)                    | 18 (7.2)                                             | 1.2                                            | 1.2                               |

Abbreviations: CI, confidence interval; OR, odds ratio.

<sup>a</sup> During the period 3 months before or after conception.

<sup>b</sup> Average daily intake during first month of pregnancy. TD median for B6 = 2.83 mg.

<sup>c</sup> Expected combined OR for multiplicative model calculated as the product of the ORs for no pesticide exposure and B6 < 2.83 mg, pesticide exposure and B6 2.83+ mg.

<sup>d</sup> Expected combined OR for additive model calculated as  $1 + (\text{the OR for no pesticide exposure and B6} < 2.83 \text{ mg} - 1) + (\text{the OR for pesticide exposure and B6 } 2.83+ \text{ mg} - 1)$ .

<sup>e</sup> ORs adjusted for home ownership, child's birth year, and maternal vitamin D (natural log) and folic acid intake during the first month of pregnancy.

**TABLE S14.** Combinations of Household Pesticide Exposure and Maternal Folic Acid and Vitamin B6 Intake the First Month of Pregnancy in Relation to Risk for Autism Spectrum Disorders (ASD)

| Pesticide Exposure During Pregnancy |                      | Maternal Folic Acid and Vitamin B6 Intake <sup>a</sup> | ASD No. (%) | Typically Developing No. (%) | Expected Joint OR: Multiplicative Model <sup>b</sup> | Expected Joint OR: Additive Model <sup>c</sup> | OR <sup>d</sup> (95% CI) | RERI (95% CI)    |
|-------------------------------------|----------------------|--------------------------------------------------------|-------------|------------------------------|------------------------------------------------------|------------------------------------------------|--------------------------|------------------|
| Indoor Sprays or Foggers            | None                 | High                                                   | 121 (36.7)  | 128 (51.6)                   |                                                      |                                                | 1.0                      |                  |
|                                     |                      | Low                                                    | 106 (32.1)  | 72 (29.0)                    |                                                      |                                                | 1.8 (1, 3.4)             |                  |
|                                     | Any                  | High                                                   | 54 (16.4)   | 32 (12.9)                    |                                                      |                                                | 1.8 (1.1, 3)             |                  |
|                                     |                      | low                                                    | 49 (14.9)   | 16 (6.5)                     | 3.2                                                  | 2.6                                            | 4.0 (1.9, 8.6)           | 1.4 (-1.2, 4.1)  |
| Pet Flea and Tick Products          | None                 | High                                                   | 142 (40.6)  | 134 (52.3)                   |                                                      |                                                | 1.0                      |                  |
|                                     |                      | Low                                                    | 134 (38.3)  | 79 (30.9)                    |                                                      |                                                | 2 (1.1, 3.6)             |                  |
|                                     | Some <sup>e</sup>    | High                                                   | 8 (2.3)     | 14 (5.5)                     |                                                      |                                                | 0.7 (0.3, 1.7)           |                  |
|                                     |                      | low                                                    | 8 (2.3)     | 6 (2.3)                      | 1.4                                                  | 1.7                                            | 1.7 (0.5, 5.4)           | -0.1 (-2.2, 2.1) |
|                                     | Regular <sup>f</sup> | High                                                   | 38 (10.9)   | 18 (7.0)                     |                                                      |                                                | 1.9 (1.0, 3.6)           |                  |
|                                     |                      | Low                                                    | 20 (5.7)    | 5 (2.0)                      | 3.8                                                  | 2.9                                            | 4.3 (1.4, 13.2)          | 1.4 (-3.2, 6.0)  |
|                                     | Any                  | High                                                   | 46 (13.1)   | 32 (12.5)                    |                                                      |                                                | 1.4 (0.8, 2.4)           |                  |
|                                     |                      | low                                                    | 28 (8.0)    | 11 (4.3)                     | 2.8                                                  | 2.4                                            | 2.9 (1.2, 6.8)           | 0.5 (-1.8, 2.7)  |
| Any Indoor <sup>g</sup> Pesticides  | None                 | High                                                   | 90 (27.1)   | 101 (41.4)                   |                                                      |                                                | 1.0                      |                  |
|                                     |                      | Low                                                    | 91 (27.4)   | 64 (26.2)                    |                                                      |                                                | 1.7 (0.9, 3.3)           |                  |
|                                     | Any                  | High                                                   | 86 (25.9)   | 56 (23.0)                    |                                                      |                                                | 1.7 (1.1, 2.7)           |                  |
|                                     |                      | low                                                    | 65 (19.6)   | 23 (9.4)                     | 2.9                                                  | 2.4                                            | 3.7 (1.8, 7.6)           | 1.3 (-0.9, 3.4)  |
| Outdoor Sprays or Foggers           | None                 | High                                                   | 104 (33.4)  | 105 (44.1)                   |                                                      |                                                | 1.0                      |                  |
|                                     |                      | Low                                                    | 92 (29.6)   | 63 (26.5)                    |                                                      |                                                | 1.7 (0.9, 3.3)           |                  |
|                                     | Some <sup>e</sup>    | High                                                   | 35 (11.3)   | 35 (14.7)                    |                                                      |                                                | 1.2 (0.7, 2.1)           |                  |
|                                     |                      | low                                                    | 17 (5.5)    | 15 (6.3)                     | 2.0                                                  | 1.9                                            | 1.6 (0.7, 4)             | -0.3 (-1.7, 1.2) |
|                                     | Regular <sup>f</sup> | High                                                   | 31 (10.0)   | 14 (5.9)                     |                                                      |                                                | 2.1 (1.0, 4.3)           |                  |
|                                     |                      | Low                                                    | 32 (10.3)   | 6 (2.5)                      | 3.6                                                  | 2.8                                            | 6.5 (2.3, 18.2)          | 3.0 (-2.5, 8.6)  |
|                                     | Any                  | High                                                   | 66 (21.2)   | 49 (20.6)                    |                                                      |                                                | 1.5 (0.9, 2.4)           |                  |



|                                                             |      |      |            |           |     |     |                |                 |
|-------------------------------------------------------------|------|------|------------|-----------|-----|-----|----------------|-----------------|
|                                                             |      | low  | 49 (15.8)  | 21 (8.8)  | 2.6 | 2.2 | 3.1 (1.5, 6.5) | 0.9 (-1.0, 2.8) |
| Any Household<br>Indoor or<br>Outdoor<br>Pesticides         | None | High | 67 (21.6)  | 75 (32.1) |     |     | 1.0            |                 |
|                                                             |      | Low  | 72 (23.2)  | 50 (21.4) |     |     | 2.0 (1, 4.1)   |                 |
|                                                             | Any  | High | 98 (31.6)  | 75 (32.1) |     |     | 1.6 (1, 2.5)   |                 |
|                                                             |      | low  | 73 (23.6)  | 34 (14.5) | 3.2 | 2.6 | 3.4 (1.7, 6.8) | 0.8 (-1.0, 2.6) |
| Any Household<br>or Agricultural<br>Pesticides <sup>h</sup> | None | High | 51 (17.9)  | 59 (27.6) |     |     | 1.0            |                 |
|                                                             |      | Low  | 56 (19.7)  | 39 (18.2) |     |     | 2.1 (1, 4.6)   |                 |
|                                                             | Any  | High | 105 (36.8) | 79 (36.9) |     |     | 1.7 (1.1, 2.8) |                 |
|                                                             |      | low  | 73 (25.6)  | 37 (17.3) | 3.6 | 2.8 | 3.6 (1.7, 7.4) | 0.8 (-1.2, 2.7) |

Abbreviations: CI, confidence interval; OR, odds ratio; RERI, relative excess risk due to interaction.

<sup>a</sup> Average daily intake during first month of pregnancy. 'High' = 800 + µg folic acid and/or 2.83 mg vitamin B6.

'Low' = < 800 µg folic acid and < 2.83 mg vitamin B6.

<sup>b</sup> Expected combined OR for multiplicative model calculated as the product of the ORs for no pesticide exposure and low folic acid/vitamin B6, pesticide exposure and high folic acid/vitamin B6.

<sup>c</sup> Expected combined OR for additive model calculated as 1 + (the OR for no pesticide exposure and low folic acid/vitamin B6 – 1) + (the OR for pesticide exposure and high folic acid/vitamin B6 – 1).

<sup>d</sup> ORs adjusted for home ownership, child's birth year, and maternal vitamin D (natural log) intake during the first month of pregnancy.

<sup>e</sup> Exposure to pesticides reported for <6 months of pregnancy.

<sup>f</sup> Exposure to pesticides reported for 6+ months of pregnancy.

<sup>g</sup> Maternally-reported exposure to professionally- or self-applied pesticide sprays or foggers, or pet pesticides (flea/tick shampoos, pouches, not collars), inside the home during pregnancy.

<sup>h</sup> Any household indoor or outdoor pesticide exposure during pregnancy; or agricultural pesticide exposure months 3 months before through 3rd month of pregnancy.

**TABLE S15.** Combinations of Agricultural Pesticide Exposure and Maternal Folic Acid and Vitamin B6 Intake the First Month of Pregnancy in Relation to Risk for Autism Spectrum Disorders (ASD) using a 1250 m Buffer

| Periconceptual Agricultural/Commercial Pesticide Exposure <sup>a</sup> | Maternal Folic Acid and Vitamin B6 Intake <sup>b</sup> | ASD No. (%) | Typically Developing No. (%) | Expected Joint OR: Multiplicative Model <sup>c</sup> | Expected Joint OR: Additive Model <sup>d</sup> | Observed OR <sup>e</sup> (95% CI) | RERI (95% CI)   |
|------------------------------------------------------------------------|--------------------------------------------------------|-------------|------------------------------|------------------------------------------------------|------------------------------------------------|-----------------------------------|-----------------|
|                                                                        |                                                        |             |                              |                                                      |                                                |                                   |                 |
| Chlorpyrifos                                                           | None                                                   | High        | 179 (51.3)                   | 148 (59.2)                                           |                                                | 1.0                               |                 |
|                                                                        |                                                        | Low         | 145 (41.6)                   | 85 (34.0)                                            |                                                | 1.7 (1, 3.1)                      |                 |
|                                                                        | Any                                                    | High        | 13 (3.7)                     | 12 (4.8)                                             |                                                | 1.1 (0.5, 2.6)                    |                 |
|                                                                        |                                                        | low         | 12 (3.4)                     | 5 (2.0)                                              | 1.9                                            | 1.8                               | 3.2 (1.0, 10.6) |
| Organophosphates                                                       | None                                                   | High        | 162 (46.4)                   | 136 (54.4)                                           |                                                | 1.0                               |                 |
|                                                                        |                                                        | Low         | 133 (38.1)                   | 80 (32.0)                                            |                                                | 1.7 (0.9, 3)                      |                 |
|                                                                        | Any                                                    | High        | 30 (8.6)                     | 24 (9.6)                                             |                                                | 1.0 (0.6, 1.9)                    |                 |
|                                                                        |                                                        | low         | 24 (6.9)                     | 10 (4.0)                                             | 1.7                                            | 1.7                               | 2.9 (1.2, 7.2)  |
| Pyrethroids                                                            | None                                                   | High        | 165 (47.3)                   | 140 (56.0)                                           |                                                | 1.0                               |                 |
|                                                                        |                                                        | Low         | 137 (39.3)                   | 80 (32.0)                                            |                                                | 1.7 (1, 3.1)                      |                 |
|                                                                        | Any                                                    | High        | 27 (7.7)                     | 20 (8.0)                                             |                                                | 1.2 (0.6, 2.2)                    |                 |
|                                                                        |                                                        | low         | 20 (5.7)                     | 10 (4.0)                                             | 2.0                                            | 1.9                               | 2.4 (1.0, 5.9)  |
| Carbamates                                                             | None                                                   | High        | 179 (51.3)                   | 155 (62.0)                                           |                                                | 1.0                               |                 |
|                                                                        |                                                        | Low         | 150 (43.0)                   | 85 (34.0)                                            |                                                | 1.9 (1.1, 3.4)                    |                 |
|                                                                        | Any                                                    | High        | 13 (3.7)                     | 5 (2.0)                                              |                                                | 1.9 (0.7, 5.6)                    |                 |
|                                                                        |                                                        | low         | 7 (2.0)                      | 5 (2.0)                                              | 3.6                                            | 2.8                               | 1.5 (0.4, 5.1)  |
| Any Agricultural Pesticides                                            | None                                                   | High        | 153 (43.8)                   | 132 (52.8)                                           |                                                | 1.0                               |                 |
|                                                                        |                                                        | Low         | 129 (37.0)                   | 76 (30.4)                                            |                                                | 1.7 (1.0, 3.1)                    |                 |
|                                                                        | Any                                                    | High        | 39 (11.2)                    | 28 (11.2)                                            |                                                | 1.2 (0.7, 2)                      |                 |
|                                                                        |                                                        | low         | 28 (8.0)                     | 14 (5.6)                                             | 2.0                                            | 1.9                               | 2.5 (1.1, 5.7)  |

Abbreviations: CI, confidence interval; OR, odds ratio; RERI, relative excess risk due to interaction.

<sup>a</sup> During the period 3 months before or after conception.

<sup>b</sup> Average daily intake during first month of pregnancy. 'High' = 800 + µg folic acid and/or 2.83 mg vitamin B6.

'Low' = < 800 µg folic acid and < 2.83 mg vitamin B6.

- <sup>c</sup> Expected combined OR for multiplicative model calculated as the product of the ORs for no pesticide exposure and low folic acid/vitamin B6, pesticide exposure and high folic/vitamin B6.
- <sup>d</sup> Expected combined OR for additive model calculated as  $1 + (\text{the OR for no pesticide exposure and low folic acid/vitamin B6} - 1) + (\text{the OR for pesticide exposure and high folic acid/vitamin B6} - 1)$ .
- <sup>e</sup> ORs adjusted for home ownership, child's birth year, and maternal vitamin D (natural log) intake during the first month of pregnancy.

**TABLE S16.** Combinations of Household, Agricultural, and Occupational Pesticide Exposure and Maternal Folic Acid Intake the First Month of Pregnancy in Relation to Risk for Autism Spectrum Disorders (ASD)

| Pesticide Exposure                                                  |      | Maternal Folic Acid Intake <sup>a</sup> | ASD No. (%) | Typically Developing No. (%) | Expected Joint OR: Multiplicative Model <sup>b</sup> | Expected Joint OR: Additive Model <sup>c</sup> | OR <sup>d</sup> (95% CI) |
|---------------------------------------------------------------------|------|-----------------------------------------|-------------|------------------------------|------------------------------------------------------|------------------------------------------------|--------------------------|
| Any Household, Agricultural or Occupational Pesticides <sup>e</sup> | None | 800 + $\mu\text{g}$                     | 40 (18.3)   | 38 (23.3)                    |                                                      |                                                | 1.0                      |
|                                                                     |      | < 800 $\mu\text{g}$                     | 44 (20.1)   | 29 (17.8)                    |                                                      |                                                | 1.2 (0.5, 2.7)           |
|                                                                     | Any  | 800 + $\mu\text{g}$                     | 71 (32.4)   | 59 (36.2)                    |                                                      |                                                | 1.3 (0.7, 2.3)           |
|                                                                     |      | < 800 $\mu\text{g}$                     | 64 (29.2)   | 37 (22.7)                    | 1.6                                                  | 1.5                                            | 1.7 (0.8, 3.5)           |

Abbreviations: CI, confidence interval; OR, odds ratio.

<sup>d</sup> ORs adjusted for home ownership, child's birth year, and maternal vitamin D (natural log), vitamin B6, and folic acid intake during the first month of pregnancy.

<sup>e</sup> Any household indoor or outdoor pesticide exposure during pregnancy; or agricultural pesticide exposure months 3 months before through 3<sup>rd</sup> month of pregnancy; or regular (vs. some or none) occupational pesticide exposure during entire index period (month 3 months before through 9<sup>th</sup> month of pregnancy).
